# Supplementary material for: Synthesis of silicon-doped reduced graphene oxide and its applications in dye-sensitive solar cells and supercapacitors
Source: Royal Society of Chemistry journal article supplement (doi:10.1039/c5ra25962b), 2016-01-01
Supplement: c5ra25962b1.pdf [file c5ra25962b1.pdf]

## Supporting information

### Synthesis of silicon-doped reduced graphene oxide and its applications in dye-sensitive solar cells and supercapacitors

Zegao Wang,<sup>abc</sup> Yuanfu Chen,<sup>\*a</sup> Pingjian Li,<sup>\*a</sup> Jiarui He,<sup>a</sup> Wanli Zhang,<sup>a</sup> Zheng Guo,<sup>c</sup> Yanrong Li,<sup>a</sup> and Mingdong Dong<sup>b</sup>

<sup>a</sup>State Key Laboratory of Electronic Thin Films and Integrated Devices, University of Electronic Science and Technology of China, Chengdu 610054, P. R. China. E-mail: [yfchen@uestc.edu.cn](mailto:yfchen@uestc.edu.cn); [lipingjian@uestc.edu.cn](mailto:lipingjian@uestc.edu.cn)

<sup>b</sup>Interdisciplinary Nanoscience Center (iNANO), Aarhus University, DK-8000 Aarhus C, Denmark

<sup>c</sup>Department of Engineering, Aarhus University, DK-8000 Aarhus C, Denmark

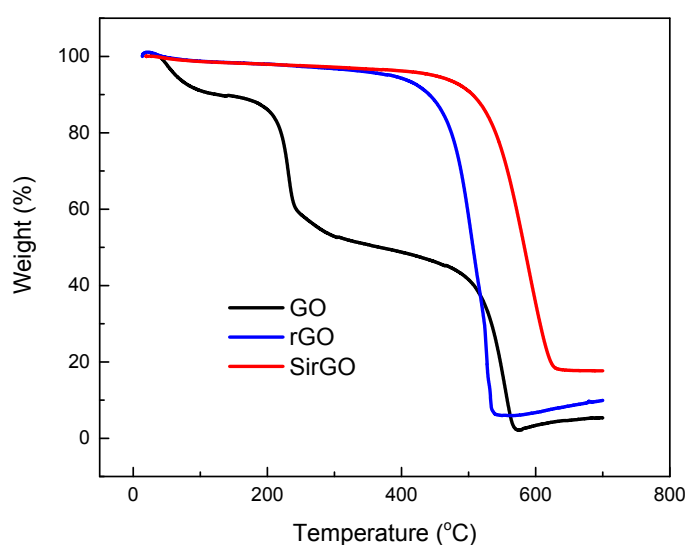

Figure S1. TGA curves of GO, rGO and Si-rGO

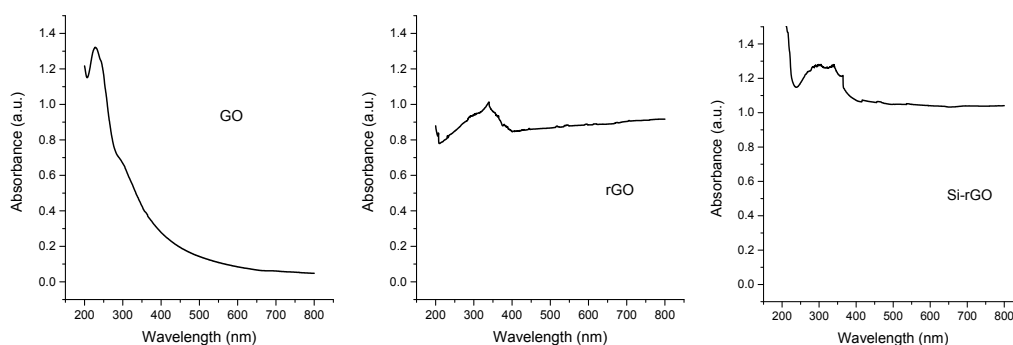

Figure S2. UV-vis absorption spectra of GO, rGO and Si-rGO. The spectrum of GO has a peak at 235 nm which is related to  $\pi$ - $\pi^*$  electron transition. After reduction, a wider peak would be observed at 300 nm, which shows the electronic conjugation of GO was restored. The spectrum of Si-rGO also has a wider peak at 300 nm, which is similar with rGO. The un-sharp of the peak for rGO and Si-rGO should be originated from their poor dispersibility in water.

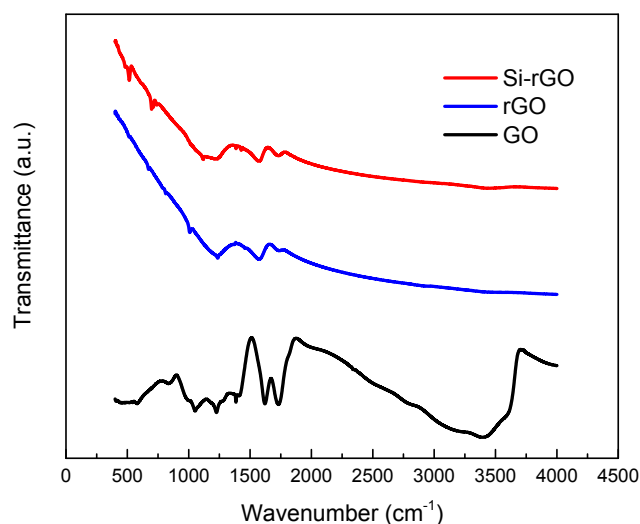

Figure S3. FTIR spectra of GO, rGO and Si-rGO. FTIR bands at 1045, 1221, 1405, 1621 and 1734 were observed for GO. The wider band at 3400  $\text{cm}^{-1}$  is corresponded to -OH group, which disappear in rGO and Si-rGO. Compared to rGO, there is no observed new band detected in Si-rGO, which should be caused by the lower Si doping concentration.
